# Supplementary material for: Association Between a 20‐Year Cardiovascular Disease Risk Score Based on Modifiable Lifestyles and Total and Cause‐Specific Mortality Among US Men and Women
Source: PubMed Central journal article supplement — J Am Heart Assoc. 2018 Oct 30;7(21):e010052. doi: 10.1161/JAHA.118.010052 (PMC6404201; doi:10.1161/jaha.118.010052), 2018-10-30
Supplement: JAH3-7-e010052-s001.pdf [file JAH3-7-e010052-s001.pdf]

# **SUPPLEMENTAL MATERIAL**

**Figure S1. Formula to estimate the 20-Year Risk of CVD based on lifestyle predictors in women.**

**WOMEN**

**20-year CVD risk (%) “Healthy Heart Score”** =  $[1 - 0.9660^{(\exp [W - 6.57301])}] \times 100\%$

where  $W = 0.10820 \times \text{age} + 0.15285$  (if **past smoker**) +  $0.90138$  (if **current smoker**) +  $0.04676 \times \text{BMI}$  -  $0.01923 \times \text{grams/d of alcohol}$  +  $0.0004 \times (\text{grams/d of alcohol})^2$  -  $0.029251 \times \text{hours/week of physical activity}$  -  $0.05113 \times \text{diet score}^*$

\*Diet score =  $(0.03626 \times \text{grams/d of cereal fiber} + 0.18283$  [if fruits + vegetables  $\geq 3$  servings/d] +  $0.14522$  [if nuts 0.1-1 servings/d +  $0.2444$  [if nuts  $>1$  servings/d] -  $0.14631 \times \text{servings/d of sugar-sweetened beverages}$  -  $0.15624 \times \text{servings/d of red and processed meats}) \times 10$

**MEN**

**20-year CVD risk (%) “Healthy Heart Score”** =  $[1 - 0.96368^{(\exp [W - 7.2437])}] \times 100\%$

where  $W = 0.13580 \times \text{age} - 0.0005 \times (\text{age})^2 + 0.06979$  (if **past smoker**) +  $0.42305$  (if **current smoker**) +  $0.07424 \times \text{BMI}$  -  $0.00898 \times \text{grams/d of alcohol}$  +  $0.0001 \times (\text{grams/d of alcohol})^2$  -  $0.01755 \times \text{hours/week of physical activity}$  -  $0.06691 \times \text{diet score}^*$

\*Diet score =  $(0.01816 \times \text{grams/d of cereal fiber} + 0.08819$  [if fruits + vegetables  $\geq 3$  servings/d] +  $0.00535$  [if nuts 0.1-1 servings/d +  $0.14285$  [if nuts  $>1$  servings/d] -  $0.14734 \times \text{servings/d of sugar-sweetened beverages}$  -  $0.07112 \times \text{servings/d of red and processed meats}) \times 10$
